# Supplementary material for: Effect of the Ni-to-CaO Ratio on Integrated CO2 Capture and Direct Methanation
Source: MDPI journal article supplement (doi:10.3390/catal13081174), 2023-07-31
Supplement: s1 [file s1]

## Supplementary Materials

# Effect of the Ni-to-CaO Ratio on Integrated CO<sub>2</sub> Capture and Direct Methanation

Jin-Hyeok Woo <sup>1,†</sup>, Seongbin Jo <sup>2,†</sup>, Ju-Eon Kim <sup>1</sup>, Tae-Young Kim <sup>3</sup>, Han-Dong Son <sup>1</sup>, Ho-Jung Ryu <sup>4</sup>,  
Byungwook Hwang <sup>4</sup>, Jae-Chang Kim <sup>1,\*</sup>, Soo-Chool Lee <sup>3,\*</sup> and Kandis Leslie Gilliard-AbdulAziz <sup>2,5,\*</sup>

<sup>1</sup> Department of Chemical Engineering, Kyungpook National University, Daegu 41566, Republic of Korea

<sup>2</sup> Department of Chemical and Environmental Engineering, University of California–Riverside, Riverside, CA 92521, USA

<sup>3</sup> Research Institute of Advanced Energy Technology, Kyungpook National University, Daegu 41566, Republic of Korea

<sup>4</sup> Korea Institute of Energy Research, Daejeon 34129, Republic of Korea

<sup>5</sup> Department of Material Science and Engineering, University of California–Riverside, Riverside, CA 92521, USA

\* Correspondence: kjchang@knu.ac.kr (J.-C.K.); soochool@knu.ac.kr (S.-C.L.); klabulaziz@engr.ucr.edu (K.L.G.-A.)

† These authors contributed equally to this work.

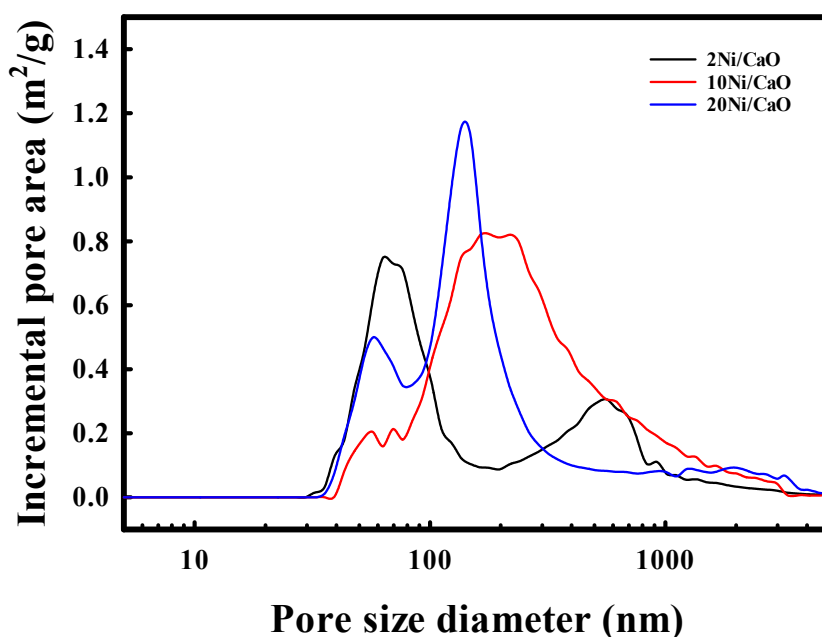

**Figure S1.** Pore size distribution from Hg porosimetry curves of 2Ni/CaO, 10Ni/CaO, and 20Ni/CaO catal-sorbents.

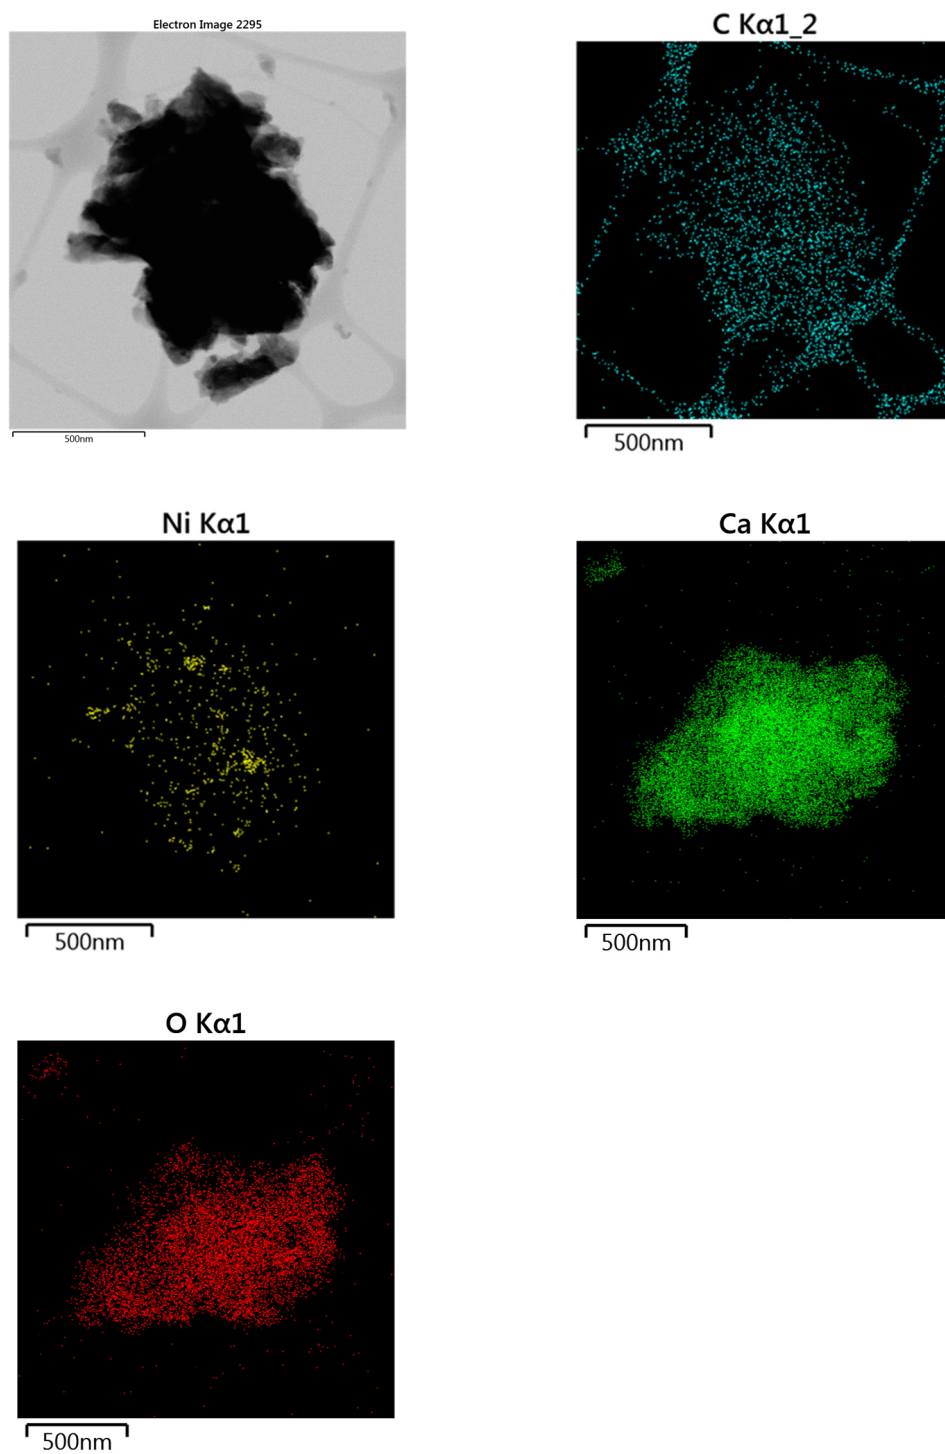

**Figure S2.** TEM-EDS mapping of the 2Ni/CaO catal-sorbent.

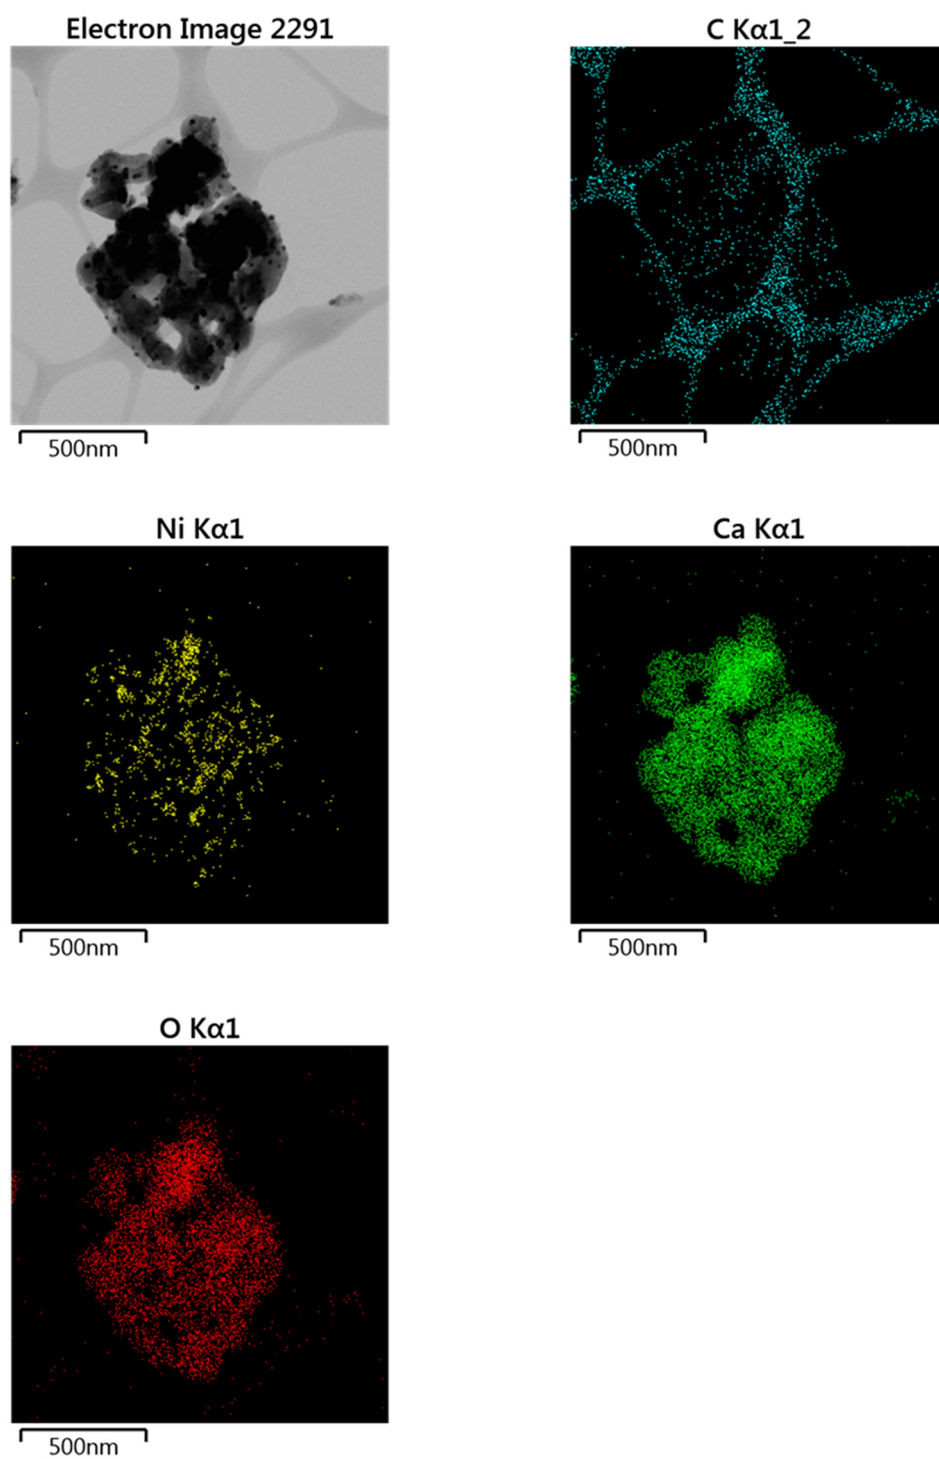

**Figure S3.** TEM-EDS mapping of the 10Ni/CaO catal-sorbent.

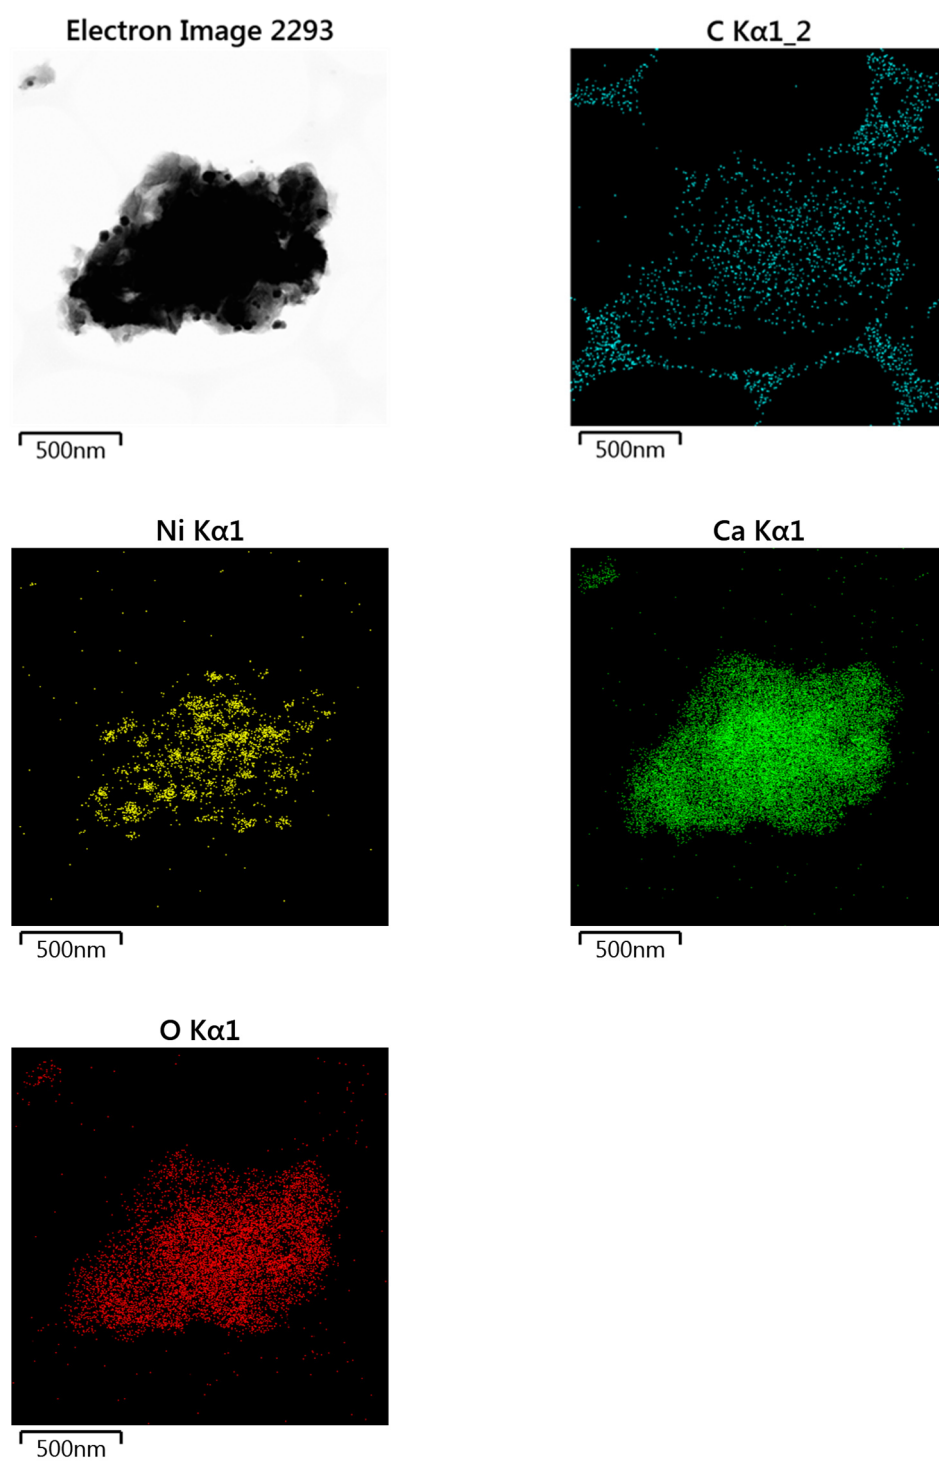

**Figure S4.** TEM-EDS mapping of the 20Ni/CaO catal-sorbent.

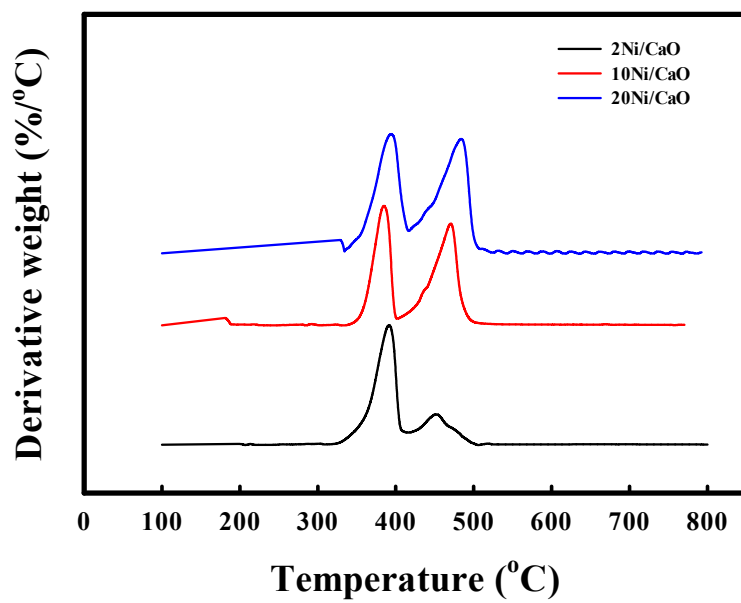

**Figure S5.** H<sub>2</sub>-TPR profiles of the 2Ni/CaO, 10Ni/CaO, and 20Ni/CaO catal-sorbents under pure H<sub>2</sub> from 100 °C to 800 °C.

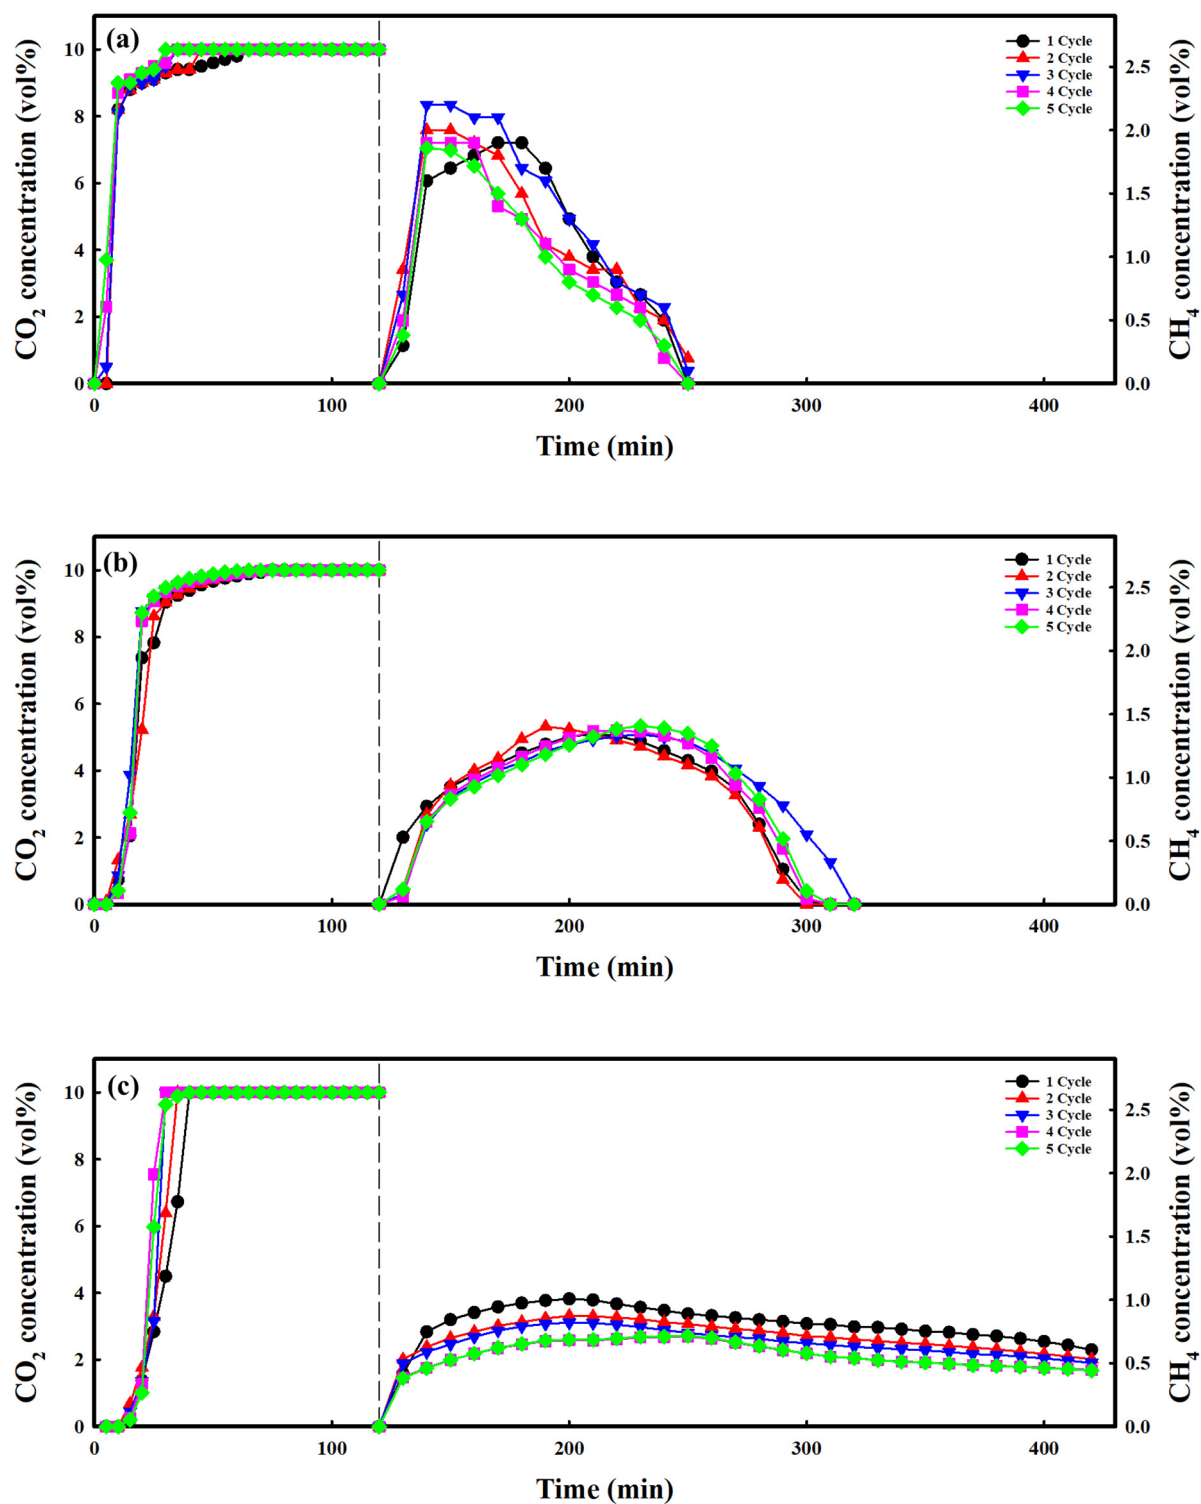

**Figure S6.** Breakthrough curves of the (a) 2Ni/CaO, (b) 10Ni/CaO, and (c) 20Ni/CaO catal-sorbents over five consecutive cycles at 500 °C.
